# Supplementary material for: Structural Evolution and Properties of Praseodymium Antimony Oxochlorides Based on a Chain-like Tertiary Building Unit
Source: MDPI journal article supplement (doi:10.3390/molecules28062725), 2023-03-17
Supplement: s1 [file s1]

**Table S1.** Crystallographic data and structural refinement details for the title compounds.

|                                                                                                       | <b>1</b>                                                                                                             | <b>2</b>                                                                                                                             | <b>3</b>                                                                                                               |
|-------------------------------------------------------------------------------------------------------|----------------------------------------------------------------------------------------------------------------------|--------------------------------------------------------------------------------------------------------------------------------------|------------------------------------------------------------------------------------------------------------------------|
| Empirical formula                                                                                     | C <sub>38</sub> H <sub>46</sub> O <sub>19</sub> N <sub>7</sub> Cl <sub>15</sub> FeSb <sub>1</sub><br>Pr <sub>4</sub> | C <sub>72</sub> H <sub>83</sub> O <sub>38</sub> N <sub>14</sub> Cl <sub>29</sub> Fe <sub>2</sub> Sb <sub>24</sub><br>Pr <sub>8</sub> | C <sub>8</sub> H <sub>25</sub> N <sub>0.5</sub> Cl <sub>12.5</sub> Sb <sub>12</sub> Pr <sub>4</sub><br>O <sub>23</sub> |
| Formula weight                                                                                        | 3517.19                                                                                                              | 6941.82                                                                                                                              | 2964.05                                                                                                                |
| Crystal system                                                                                        | monoclinic                                                                                                           | orthorhombic                                                                                                                         | monoclinic                                                                                                             |
| Space group                                                                                           | <i>P</i> 2 <sub>1</sub> / <i>c</i>                                                                                   | <i>Pccn</i>                                                                                                                          | <i>C</i> 2/ <i>m</i>                                                                                                   |
| T/K                                                                                                   | 17.3764(10)                                                                                                          | 15.1348(5)                                                                                                                           | 30.385(2)                                                                                                              |
| $\lambda/\text{\AA}$                                                                                  | 15.6415(9)                                                                                                           | 31.4569(7)                                                                                                                           | 14.9201(12)                                                                                                            |
| <i>a</i> / $\text{\AA}$                                                                               | 30.6147(18)                                                                                                          | 32.3294(9)                                                                                                                           | 11.2014(7)                                                                                                             |
| <i>b</i> / $\text{\AA}$                                                                               | 90                                                                                                                   | 90                                                                                                                                   | 90                                                                                                                     |
| <i>c</i> / $\text{\AA}$                                                                               | 105.791(6)                                                                                                           | 90                                                                                                                                   | 90.379(7)                                                                                                              |
| $\beta/^\circ$                                                                                        | 90                                                                                                                   | 90                                                                                                                                   | 90                                                                                                                     |
| <i>V</i> / $\text{\AA}^3$                                                                             | 8006.8(8)                                                                                                            | 15391.8(7)                                                                                                                           | 5078.1(6)                                                                                                              |
| <i>Z</i>                                                                                              | 4                                                                                                                    | 4                                                                                                                                    | 4                                                                                                                      |
| <i>D<sub>c</sub></i> / Mg·m <sup>-3</sup>                                                             | 2.918                                                                                                                | 2.996                                                                                                                                | 3.877                                                                                                                  |
| $\mu/\text{mm}^{-1}$                                                                                  | 7.090                                                                                                                | 58.396                                                                                                                               | 10.743                                                                                                                 |
| <i>F</i> (000)                                                                                        | 6416                                                                                                                 | 12632                                                                                                                                | 5284                                                                                                                   |
| Measured refls.                                                                                       | 79381                                                                                                                | 75286                                                                                                                                | 13723                                                                                                                  |
| Independent refls.                                                                                    | 16255                                                                                                                | 13605                                                                                                                                | 6374                                                                                                                   |
| <i>R</i> <sub>int</sub>                                                                               | 0.0609                                                                                                               | 0.1299                                                                                                                               | 0.0340                                                                                                                 |
| No. of parameters                                                                                     | 956                                                                                                                  | 772                                                                                                                                  | 300                                                                                                                    |
| <i>GOF</i>                                                                                            | 1.068                                                                                                                | 1.053                                                                                                                                | 1.051                                                                                                                  |
| <sup>a</sup> <i>R</i> <sub>1</sub> , <sup>b</sup> <i>wR</i> <sub>2</sub> [ <i>I</i> > 2σ( <i>I</i> )] | <i>R</i> <sub>1</sub> = 0.0345,<br><i>wR</i> <sub>2</sub> = 0.0605                                                   | <i>R</i> <sub>1</sub> = 0.0647,<br><i>wR</i> <sub>2</sub> = 0.1699                                                                   | <i>R</i> <sub>1</sub> = 0.0330,<br><i>wR</i> <sub>2</sub> = 0.0659                                                     |
| <sup>a</sup> <i>R</i> <sub>1</sub> , <sup>b</sup> <i>wR</i> <sub>2</sub> (all data)                   | <i>R</i> <sub>1</sub> = 0.0641,<br><i>wR</i> <sub>2</sub> = 0.0717                                                   | <i>R</i> <sub>1</sub> = 0.0916,<br><i>wR</i> <sub>2</sub> = 0.1977                                                                   | <i>R</i> <sub>1</sub> = 0.0515,<br><i>wR</i> <sub>2</sub> = 0.0734                                                     |

$$^a R_1 = \sum \|F_o| - |F_c|\| / \sum |F_o| \quad ^b wR_2 = [\sum w(F_o^2 - F_c^2)^2 / \sum w(F_o^2)^2]^{1/2}$$

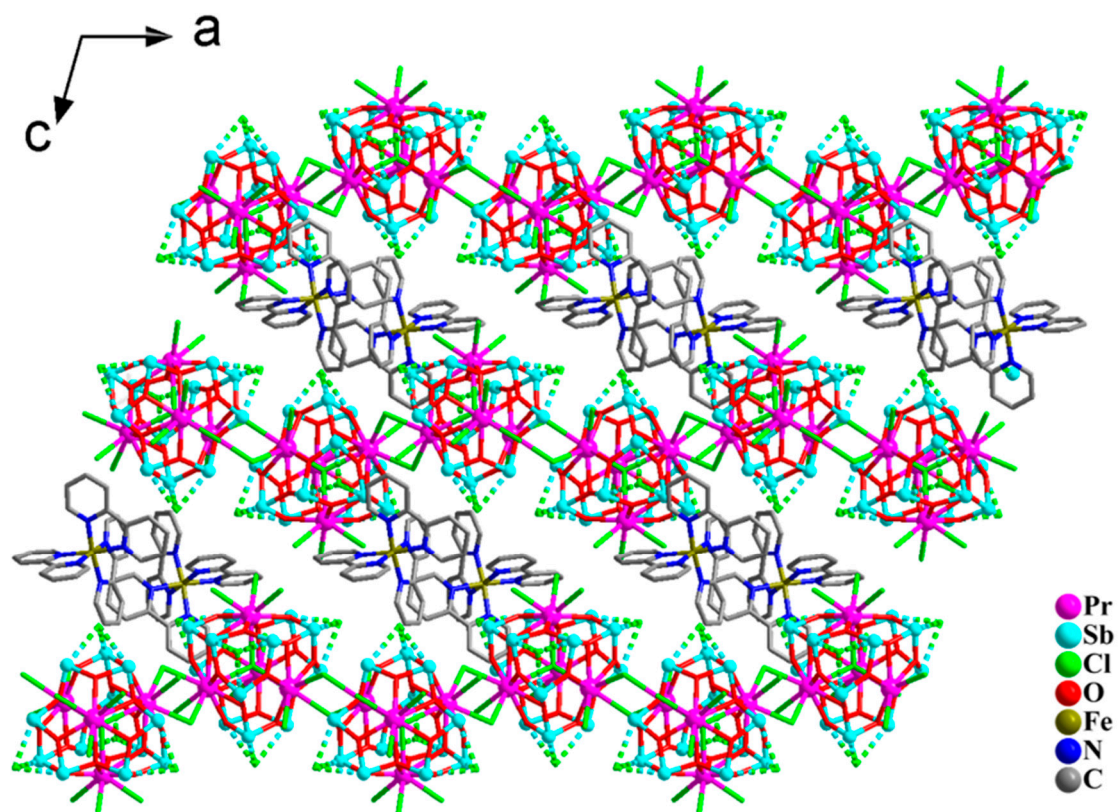

**Figure S1.** View along the *b*-axis of the packing of anionic chains together with the  $[\text{Fe}(2,2'\text{-bpy})_3]^{2+}$  cations in compound 1. For clarity, the guest molecules and H atoms are omitted.

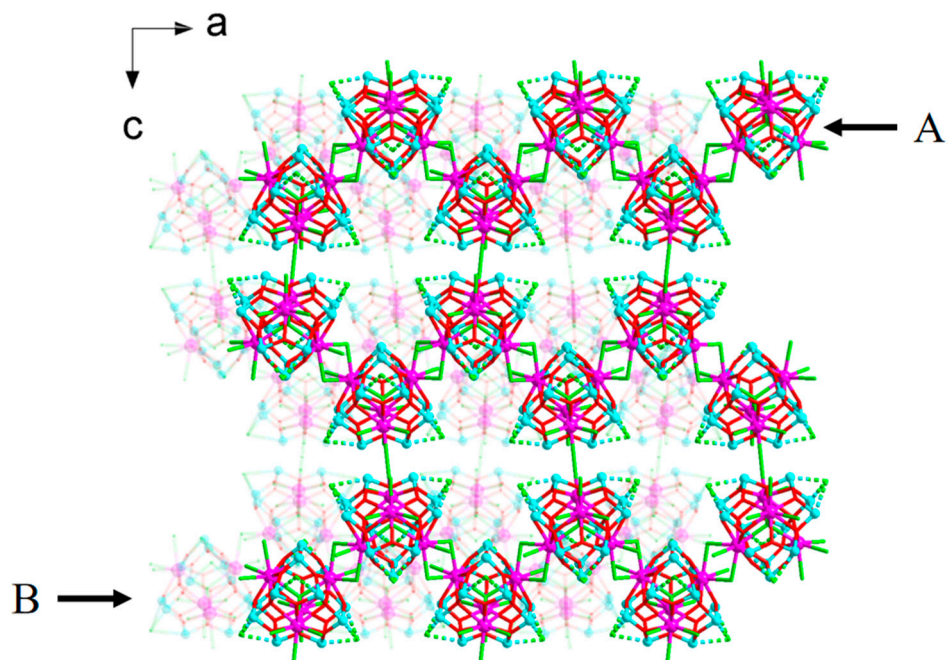

**Figure S2.** View along the *b*-axis of the packing of the anionic layers in compound 2.

(a)

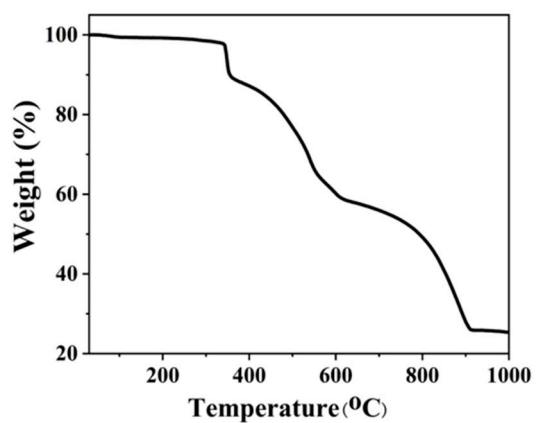

(b)

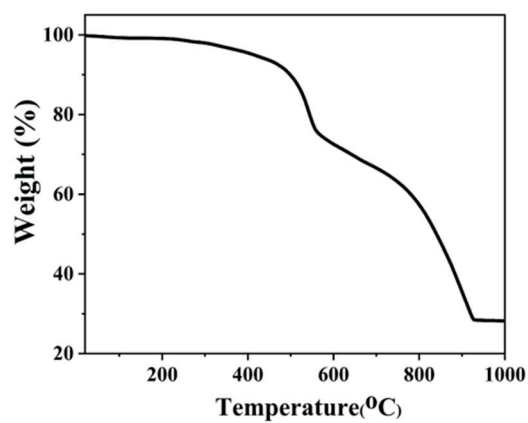

**Figure S3.** Thermogravimetric curves for compounds **1** (a) and **3** (b).

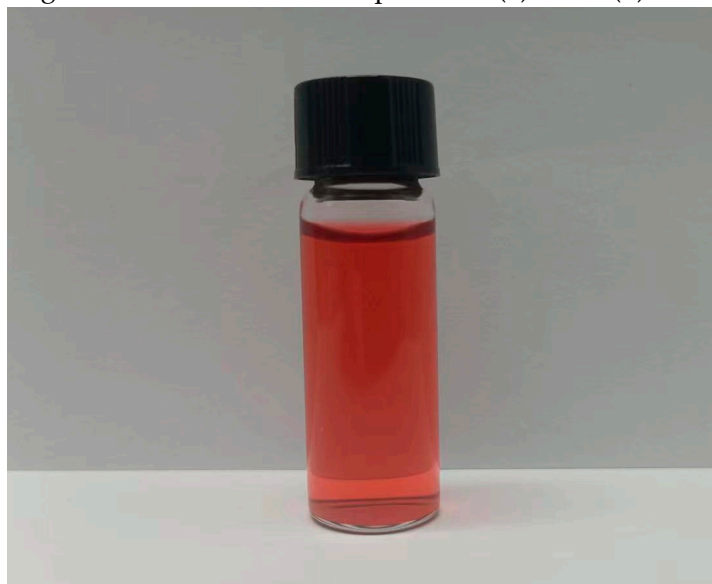

**Figure S4.** Photograph for the solution formed by dissolving 4 mg compound **1** in 4 mL water.

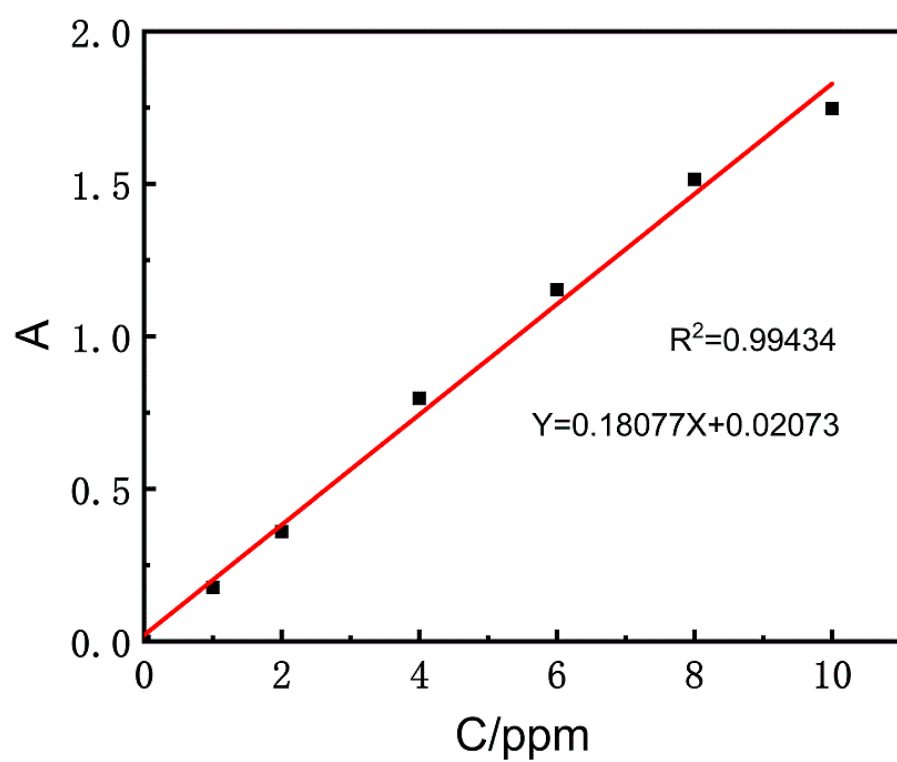

**Figure S5.** Standard curve for methylene blue solution; the horizontal coordinate is the concentration and the vertical coordinate is the absorbance.
